# Supplementary material for: Technical Note: Revisiting the general calibration of cosmic-ray neutron sensors to estimate soil water content
Source: Copernicus journal article supplement (doi:10.5194/hess-28-989-2024), 2024-02-28
Supplement: Supplementary file 1 [file hess-28-989-2024-supplement.pdf]

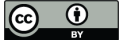

*Supplement of*

## **Technical Note: Revisiting the general calibration of cosmic-ray neutron sensors to estimate soil water content**

**Maik Heistermann et al.**

*Correspondence to:* Maik Heistermann ([maik.heistermann@uni-potsdam.de](mailto:maik.heistermann@uni-potsdam.de))

The copyright of individual parts of the supplement might differ from the article licence.

## S1. Partial derivatives

In this section, we provide the partial derivatives of  $\theta^G$  (Eq. 2 in the technical note) and  $\theta^L$  (Eq. 10 in the technical note). For the sake of comprehensibility, we will reproduce the underlying equations for  $\theta^G$  and  $\theta^L$  at the beginning of the following sub-sections.

### 5 S1.1 Partial derivatives of $\theta^G$

The following is the equation for the general calibration function:

$$\theta^G(N) = \left( \frac{a_0}{f_p \cdot f_h \cdot f_{in} \cdot f_b \cdot f_s \cdot \frac{N}{N_0} - a_1} - a_2 - \theta_g^{OM} - \theta_g^{LW} \right) \cdot \frac{\rho_b}{\rho_w} \quad (S1)$$

Assuming  $f_p = f_h = f_{in} = 1$  and including Eqs. 6-9 from the technical note, the partial derivatives required for the error propagation result to the following:

$$10 \quad \frac{\partial \theta}{\partial N} = \frac{0.009^{-1} \cdot a_0 \cdot \rho_b \cdot (\text{AGB} - 0.009^{-1}) \cdot f_s \cdot N_0}{\rho_w \cdot (a_1 \cdot (\text{AGB} - 0.009^{-1}) \cdot N_0 + 0.009^{-1} \cdot f_s \cdot N)^2} \quad (S2)$$

$$\frac{\partial \theta}{\partial N_0} = \frac{0.009^{-1} \cdot a_0 \cdot \rho_b \cdot (\text{AGB} - 0.009^{-1}) \cdot f_s \cdot N}{\rho_w \cdot (a_1 \cdot (\text{AGB} - 0.009^{-1}) \cdot N_0 + 0.009^{-1} \cdot f_s \cdot N)^2} \quad (S3)$$

$$\frac{\partial \theta}{\partial f_s} = \frac{0.009^{-1} \cdot a_0 \cdot \rho_b \cdot (\text{AGB} - 0.009^{-1}) \cdot N \cdot N_0}{\rho_w \cdot (a_1 \cdot (\text{AGB} - 0.009^{-1}) \cdot N_0 + 0.009^{-1} \cdot f_s \cdot N)^2} \quad (S4)$$

$$\frac{\partial \theta}{\partial \text{AGB}} = \frac{0.009 \cdot a_0 \cdot \rho_b \cdot f_s \cdot N \cdot N_0}{(\rho_w \cdot (a_1 \cdot N_0 \cdot (0.009 \cdot \text{AGB} - 1) + f_s \cdot N)^2)} \quad (S5)$$

$$\frac{\partial \theta}{\partial \rho_b} = \left( \frac{a_0}{\frac{f_s \cdot N}{N_0 \cdot (1 - \text{AGB} \cdot 0.009)} - a_1} - a_2 - s \cdot 0.556 - \theta_g^{LW} \right) \cdot \frac{1}{\rho_w} \quad (S6)$$

$$15 \quad \frac{\partial \theta}{\partial OM} = -0.556 \cdot \frac{\rho_b}{\rho_w} \quad (S7)$$

$$\frac{\partial \theta}{\partial \theta_g^{LW}} = -\frac{\rho_b}{\rho_w} \quad (S8)$$

## S1.2 Partial derivatives of $\theta^L$

The following is the equation for the general calibration function:

$$\theta^L(N) = \left( a_0 \cdot \left( \frac{\tau \cdot N}{\tau_{\text{cal}} \cdot N_{\text{cal}}} \cdot \left( \frac{a_0}{\theta_{\text{cal}} \cdot \frac{\rho_w}{\rho_b} + a_2} + a_1 \right) - a_1 \right) - a_2 \right)^{-1} \cdot \frac{\rho_b}{\rho_w} \quad (\text{S9})$$

20 Assuming  $\tau = \tau_{\text{cal}} = 1$ , the partial derivatives required for the error propagation result to the following:

$$\frac{\partial \theta}{\partial N} = - \frac{a_0 \cdot \rho_b \cdot N_{\text{cal}} \cdot (a_2 \cdot \rho_b + \theta_{\text{cal}} \cdot \rho_w) \cdot (a_0 \cdot \rho_b + a_2 \cdot a_1 \cdot \rho_b + a_1 \cdot \theta_{\text{cal}} \cdot \rho_w)}{\rho_w \cdot (a_2 \cdot a_1 \cdot \rho_b \cdot (N_{\text{cal}} - N) - a_0 \cdot \rho_b \cdot N + a_1 \cdot \theta_{\text{cal}} \cdot \rho_w \cdot (N_{\text{cal}} - N))^2} \quad (\text{S10})$$

$$\frac{\partial \theta}{\partial N_{\text{cal}}} = \frac{a_0 \cdot \rho_b \cdot N \cdot (a_2 \cdot \rho_b + \theta_{\text{cal}} \cdot \rho_w) \cdot (a_0 \cdot \rho_b + a_2 \cdot a_1 \cdot \rho_b + a_1 \cdot \theta_{\text{cal}} \cdot \rho_w)}{\rho_w \cdot (a_1 \cdot (N - N_{\text{cal}}) \cdot (a_2 \cdot \rho_b + \theta_{\text{cal}} \cdot \rho_w) + a_0 \cdot \rho_b \cdot N)^2} \quad (\text{S11})$$

$$\frac{\partial \theta}{\partial \theta_{\text{cal}}} = \frac{a_0^2 \cdot \rho_b^2 \cdot N \cdot N_{\text{cal}}}{(a_1 \cdot (N - N_{\text{cal}}) \cdot (a_2 \cdot \rho_b + \rho_w \cdot \theta_{\text{cal}}) + a_0 \cdot \rho_b \cdot N)^2} \quad (\text{S12})$$

$$\begin{aligned} \frac{\partial \theta}{\partial \rho_b} = & \frac{1}{\rho_w \cdot (a_1 \cdot (N - N_{\text{cal}}) \cdot (a_2 \cdot \rho_b + \theta_{\text{cal}} \cdot \rho_w) + a_0 \cdot N \cdot \rho_b)^2} \cdot ((a_1 \cdot (N - N_{\text{cal}})(a_2 \cdot \rho_b + \theta_{\text{cal}} \cdot \rho_w) + a_0 \cdot N \cdot \rho_b) \\ & \cdot (a_0 \cdot N_{\text{cal}}(a_2 \cdot \rho_b + \theta_{\text{cal}} \cdot \rho_w) - a_2 \cdot (a_1 \cdot (N - N_{\text{cal}}) \cdot (a_2 \cdot \rho_b + \theta_{\text{cal}} \cdot \rho_w) + a_0 \cdot N \cdot \rho_b)) \\ & - a_0^2 \cdot N_{\text{cal}} \cdot N \cdot \theta_{\text{cal}} \cdot \rho_w \cdot \rho_b) \end{aligned} \quad (\text{S13})$$
